# Supplementary material
Source: ML conference proceedings conference paper supplement (https://openaccess.thecvf.com/content/ICCV2023/html/Yuan_PhysDiff_Physics-Guided_Human_ICCV_2023_paper.html)
Supplement: Supplementary file 3 [file Yuan_PhysDiff_Physics-Guided_Human_ICCV_2023_supplemental.zip]

Archive with 4 entries (4 files):
- supp_video.mp4
- __MACOSX/._supp_video.mp4
- supp_doc.pdf
- __MACOSX/._supp_doc.pdf
